# Supplementary material for: DRD4 Rare Variants in Attention-Deficit/Hyperactivity Disorder (ADHD): Further Evidence from a Birth Cohort Study
Source: PubMed Central journal article supplement (PMC3877354; doi:10.1371/journal.pone.0085164), 2013-12-31

# Alignment of 4R amino acid sequence variants

|                  | 16          | 32            | 48              | 64                               |
|------------------|-------------|---------------|-----------------|----------------------------------|
| 1-2-3-4          | PAPRLPQDPCG | PDCAPPAPGLPRG | PCGPDCAAPSLP    | QDPCGPDCAAPPAPGLPPDPCGSNCAP : 64 |
| 1-2-13-4         | PAPRLPQDPCG | PDCAPPAPGLPRG | PCGPDCAAPGLP    | QDPCGPDCAAPPAPGLPPDPCGSNCAP : 64 |
| 1-2-14-4         | PAPRLPQDPCG | PDCAPPAPGLPRG | PCGPDCAAPSLP    | QDPCGPDCAAPPAPGLPPDPCGSNCAP : 64 |
| 1-8-3-4          | PAPRLPQDPCG | PDCAPPAPCLPRG | PCGPDCAAPSLP    | QDPCGPDCAAPPAPGLPPDPCGSNCAP : 64 |
| 1-2-5-4          | PAPRLPQDPCG | PDCAPPAPGLPRG | PCGPDCAAPPAPGLP | QDPCGPDCAAPPAPGLPPDPCGSNCAP : 64 |
| 1-2-12-4         | PAPRLPQDPCG | PDCAPPAPGLPRG | PCGPDCAAPGLP    | QDPCGPDCAAPPAPGLPPDPCGSNCAP : 64 |
| 1-2-6-4          | PAPRLPQDPCG | PDCAPPAPGLPRG | PCGPDCAAPGLP    | PDPCGPDCAAPPAPGLPPDPCGSNCAP : 64 |
| 1-26-3-4         | PAPRLPQDPCG | PDCAPPAPGLPRV | PCGPDCAAPSLP    | QDPCGPDCAAPPAPGLPPDPCGSNCAP : 64 |
| 1-17-3-4         | PAPRLPQDPCG | PDCAPPAPGLPPD | PCGSNCAPAPSLP   | QDPCGPDCAAPPAPGLPPDPCGSNCAP : 64 |
| <b>1-2-14-47</b> | PAPRLPQDPCG | PDCAPPAPGLPRG | PCGPDCAAPSLP    | QDPCGPDCAAPPAPGLPQDPCGSNCAP : 64 |
| <b>1-2-48-4</b>  | PAPRLPQDPCG | PDCAPPAPGLPRG | PCGPDCAAPGLP    | PDPCGPDCAAPPAPGLPPDPCGSNCAP : 64 |
| <b>1-46-13-4</b> | PAPRLPQDPCG | PDCAPPAPGLPRG | PCGPDCAAPGLP    | QDPCGPDCAAPPAPGLPPDPCGSNCAP : 64 |
| <b>45-2-3-4</b>  | PAPRLPQDPCG | PDCAPPAPGLPRG | PCGPDCAAPSLP    | QDPCGPDCAAPPAPGLPPDPCGSNCAP : 64 |
| <b>44-2-3-4</b>  | PAPCLPQDPCG | PDCAPPAPGLPRG | PCGPDCAAPSLP    | QDPCGPDCAAPPAPGLPPDPCGSNCAP : 64 |

# Alignment of 7R amino acid sequence variants

|                         | 16              | 32            | 48              | 64      | 80          |       |                   |
|-------------------------|-----------------|---------------|-----------------|---------|-------------|-------|-------------------|
| 1-2-6-5-2-5-4 :         | PAPRLPQDPCG     | PDCAPPAPGLPRG | PCGPDPCAPPAPGLP | QDPCGPD | CAPPAPGLPRG | PCGPD | CAPPAPGLPQDP : 89 |
| 1-2-6-5-2-5-19 :        | PAPRLPQDPCG     | PDCAPPAPGLPRG | PCGPDPCAPPAPGLP | QDPCGPD | CAPPAPGLPRG | PCGPD | CAPPAPGLPQDP : 89 |
| 1-8-25-5-2-5-4 :        | PAPRLPQDPCG     | PDCAPPAPGLPRG | PCGPDPCAPPAPGLP | QDPCGPD | CAPPAPGLPRG | PCGPD | CAPPAPGLPQDP : 89 |
| 1-2-3-17-2-5-4 :        | PAPRLPQDPCG     | PDCAPPAPGLPRG | PCGPDPCAPPAPGLP | QDPCGPD | CAPPAPGLPRG | PCGPD | CAPPAPGLPQDP : 89 |
| 1-2-6-1-2-3-4 :         | PAPRLPQDPCG     | PDCAPPAPGLPRG | PCGPDPCAPPAPGLP | QDPCGPD | CAPPAPGLPRG | PCGPD | CAPPAPGLPQDP : 89 |
| 1-2-6-5-2-3-4 :         | PAPRLPQDPCG     | PDCAPPAPGLPRG | PCGPDPCAPPAPGLP | QDPCGPD | CAPPAPGLPRG | PCGPD | CAPPAPGLPQDP : 89 |
| <b>1-2-5-5-2-5-4 :</b>  | PAPRLPQDPCG     | PDCAPPAPGLPRG | PCGPDPCAPPAPGLP | QDPCGPD | CAPPAPGLPRG | PCGPD | CAPPAPGLPQDP : 89 |
| 1-2-6-5-37-5-4 :        | PAPRLPQDPCG     | PDCAPPAPGLPRG | PCGPDPCAPPAPGLP | QDPCGPD | CAPPAPGLPRG | PCGPD | CAPPAPGLPQDP : 89 |
| <b>1-2-6-5-39-3-4 :</b> | PAPRLPQDPCG     | PDCAPPAPGLPRG | PCGPDPCAPPAPGLP | QDPCGPD | CAPPAPGLPRG | PCGPD | CAPPAPGLPQDP : 89 |
| <b>40-2-6-5-2-5-4 :</b> | PAPRLPQDPCG     | PDCAPPAPGLPRG | PCGPDPCAPPAPGLP | QDPCGPD | CAPPAPGLPRG | PCGPD | CAPPAPGLPQDP : 89 |
| <b>1-41-6-5-2-5-4 :</b> | PAPRLPQDPCG     | PDCAPPAPGLPRG | PCGPDPCAPPAPGLP | QDPCGPD | CAPPAPGLPRG | PCGPD | CAPPAPGLPQDP : 89 |
|                         | 96              | 112           |                 |         |             |       |                   |
| 1-2-6-5-2-5-4 :         | CGPDCAPPAPGLPPD | PCGSNCAP      |                 |         |             |       | : 112             |
| 1-2-6-5-2-5-19 :        | CGPDCAPPAPGLPPD | PCGSNCAP      |                 |         |             |       | : 112             |
| 1-8-25-5-2-5-4 :        | CGPDCAPPAPGLPPD | PCGSNCAP      |                 |         |             |       | : 112             |
| 1-2-3-17-2-5-4 :        | CGPDCAPPAPGLPPD | PCGSNCAP      |                 |         |             |       | : 112             |
| 1-2-6-1-2-3-4 :         | CGPDCAPPAPGLPPD | PCGSNCAP      |                 |         |             |       | : 112             |
| 1-2-6-5-2-3-4 :         | CGPDCAPPAPGLPPD | PCGSNCAP      |                 |         |             |       | : 112             |
| <b>1-2-5-5-2-5-4 :</b>  | CGPDCAPPAPGLPPD | PCGSNCAP      |                 |         |             |       | : 112             |
| 1-2-6-5-37-5-4 :        | CGPDCAPPAPGLPPD | PCGSNCAP      |                 |         |             |       | : 112             |
| <b>1-2-6-5-39-3-4 :</b> | CGPDCAPPAPGLPPD | PCGSNCAP      |                 |         |             |       | : 112             |
| <b>40-2-6-5-2-5-4 :</b> | CGPDCAPPAPGLPPD | PCGSNCAP      |                 |         |             |       | : 112             |
| <b>1-41-6-5-2-5-4 :</b> | CGPDCAPPAPGLPPD | PCGSNCAP      |                 |         |             |       | : 112             |

# Intrinsic protein disorder prediction for 4R haplotypes

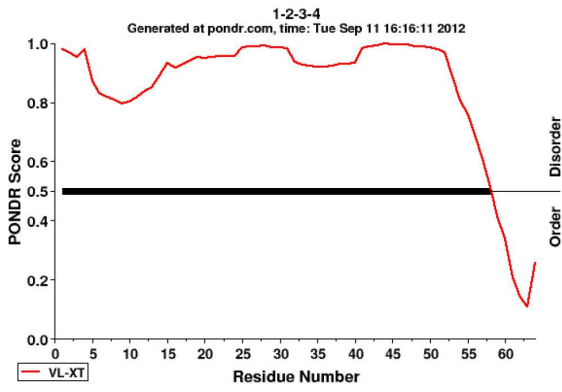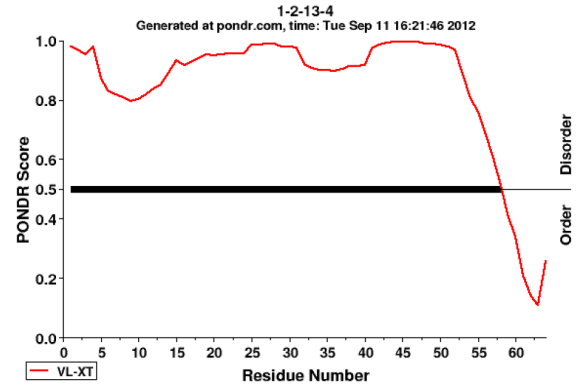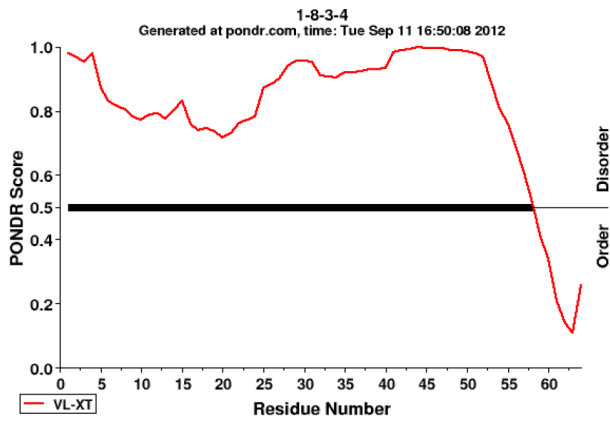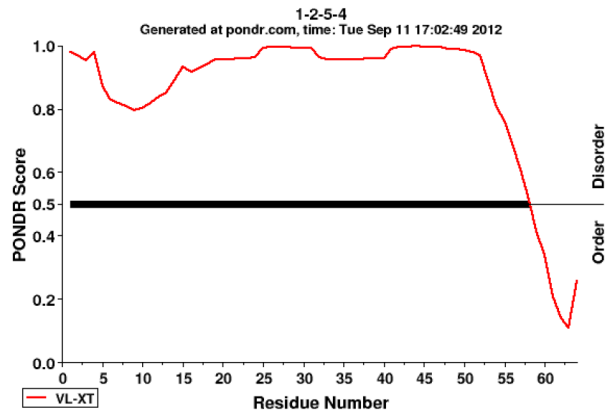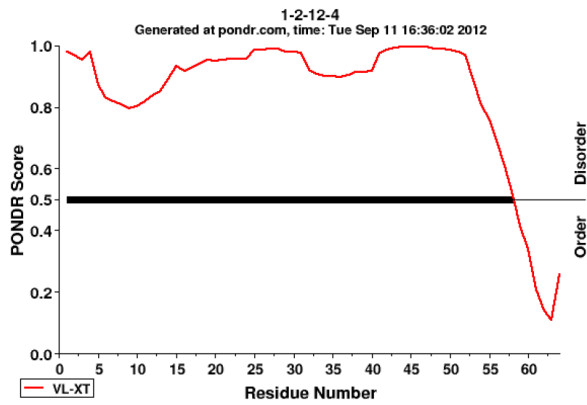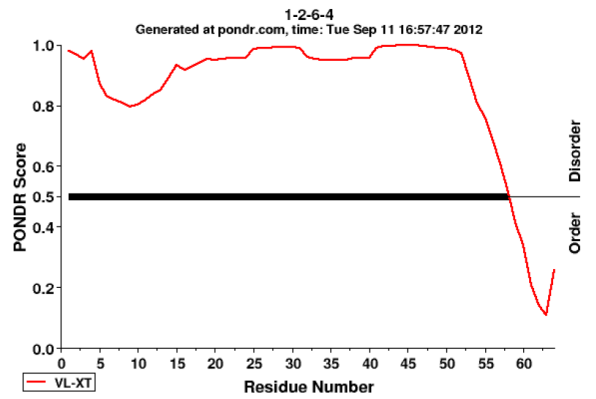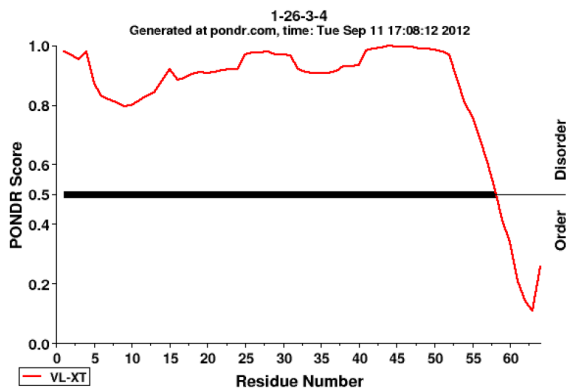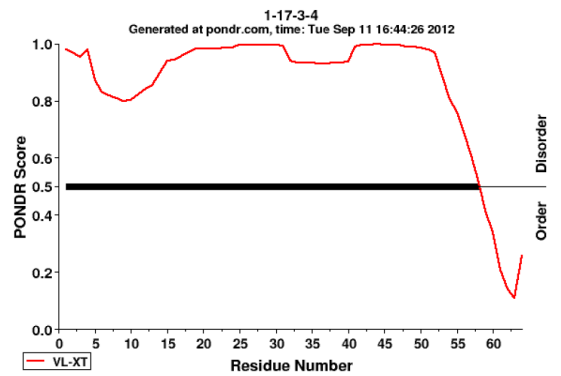

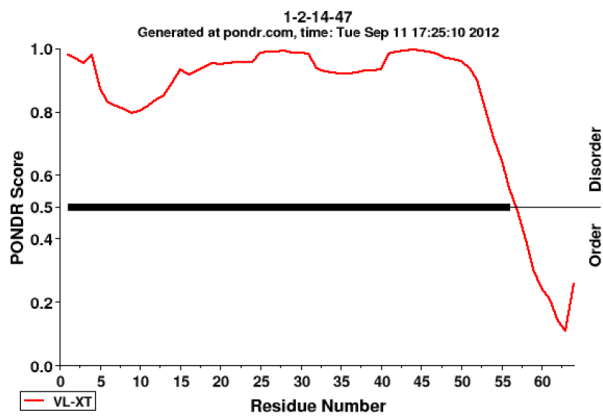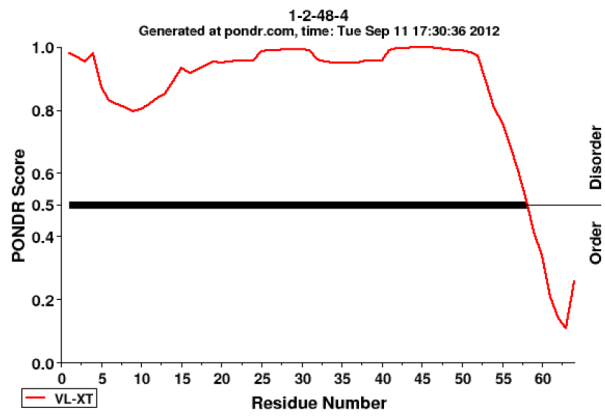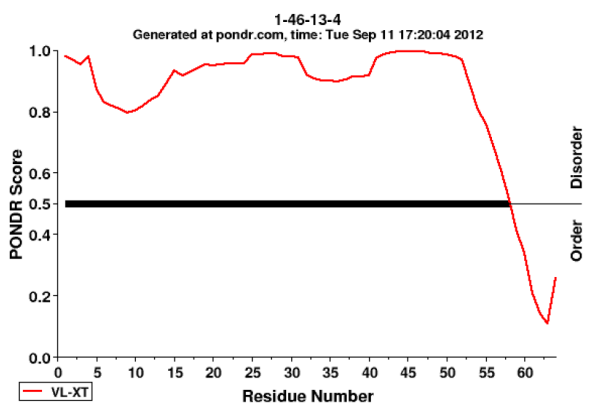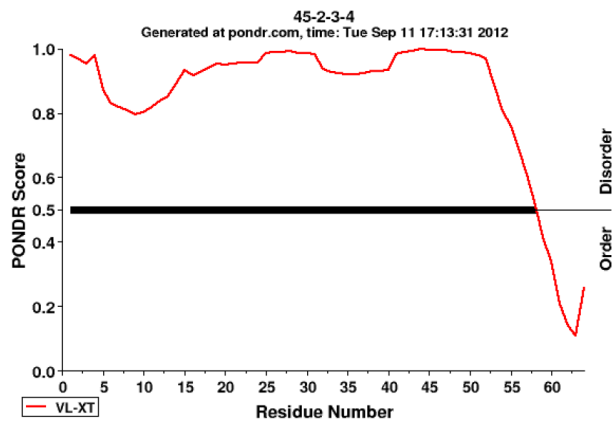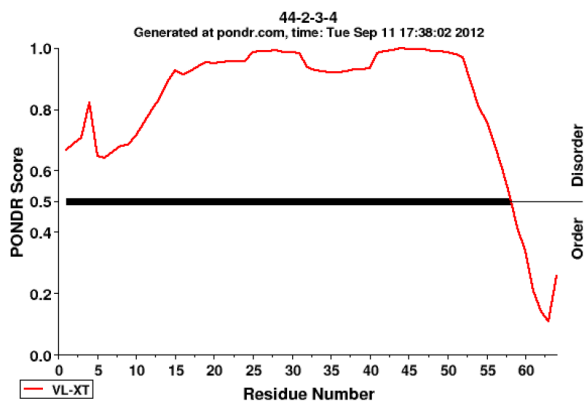

# Intrinsic protein disorder prediction for 7R haplotypes

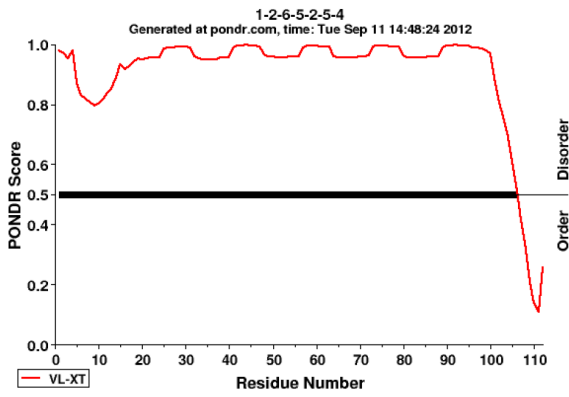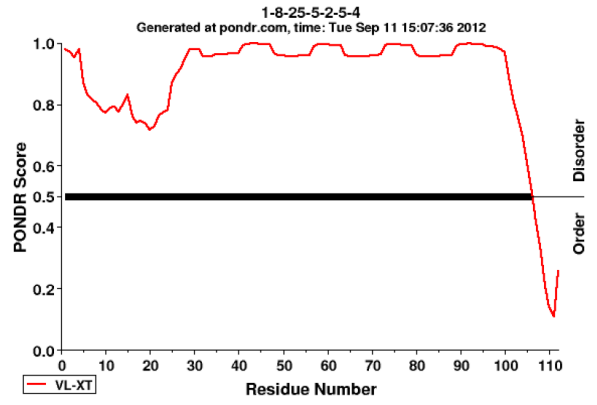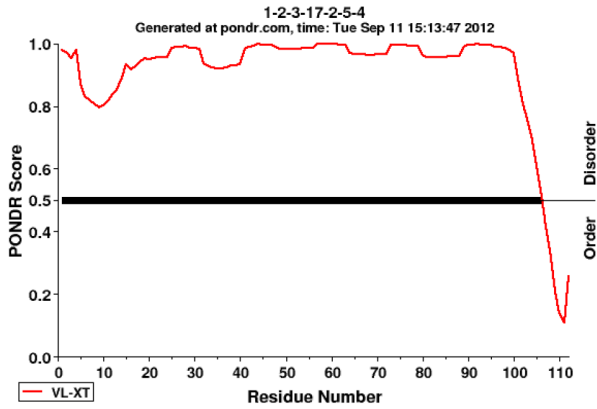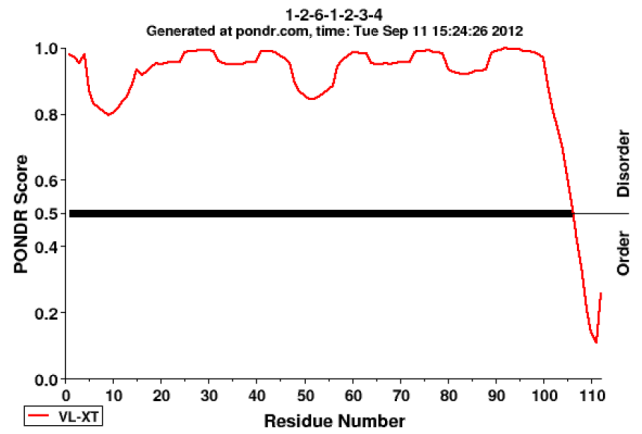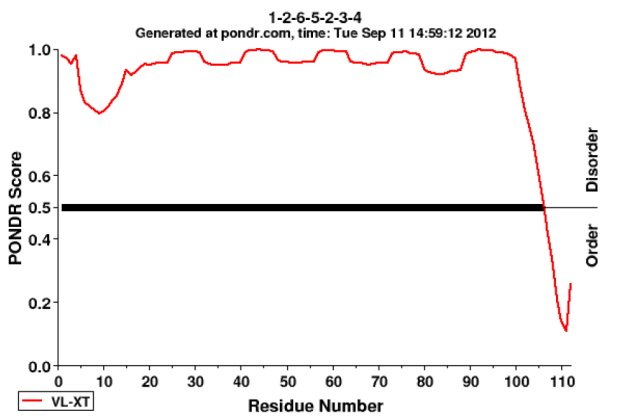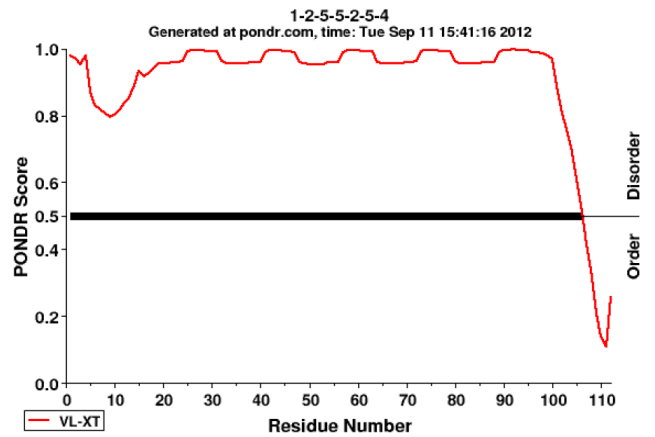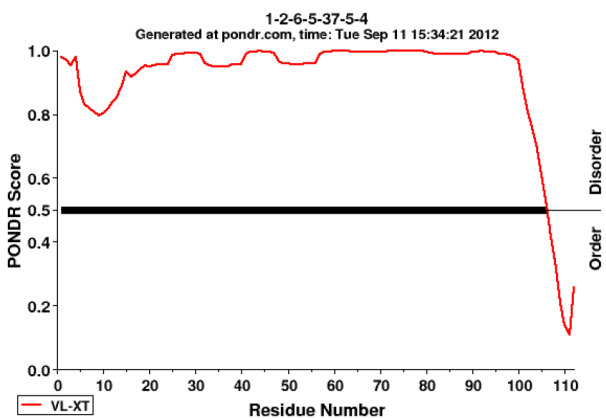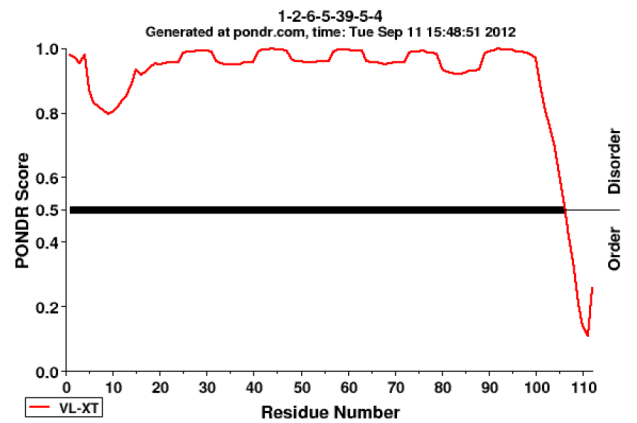

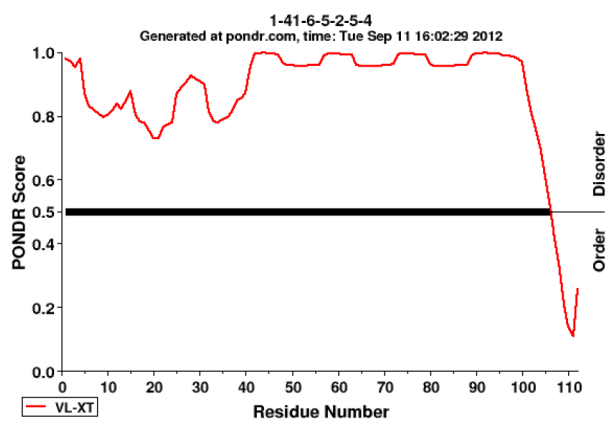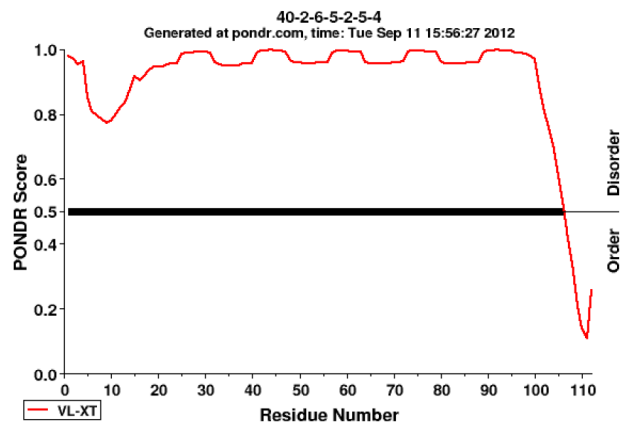

Supplement: pone.0085164.s002.pdf [file pone.0085164.s002.pdf]
