# Supplementary material for: DRD4 Rare Variants in Attention-Deficit/Hyperactivity Disorder (ADHD): Further Evidence from a Birth Cohort Study
Source: PubMed Central journal article supplement (PMC3877354; doi:10.1371/journal.pone.0085164), 2013-12-31
Supplement: pone.0085164.s001.pdf [file pone.0085164.s001.pdf]

## 2R haplotypes

|      | 1 <sup>st</sup> motif | 48 | 2 <sup>nd</sup> motif                                                                         | 96   |
|------|-----------------------|----|-----------------------------------------------------------------------------------------------|------|
| 1-4  | 1                     | :  | ACCCGCGCCCCGCTCCCCCAGGACCCCTGCGGCCCGGACTGTGCGCCCCCGCGCCCGGCTCCCCCGGACCCCTGCGGCTCCAACCTGTGCTCC | : 96 |
| 30-4 | 1                     | :  | .....T.....                                                                                   | : 96 |

## 4R haplotypes

|           | 1 <sup>st</sup> motif | 48 | 2 <sup>nd</sup> motif                                                                                                 | 96 | 3 <sup>rd</sup> motif | 144   |
|-----------|-----------------------|----|-----------------------------------------------------------------------------------------------------------------------|----|-----------------------|-------|
| 1-2-3-4   | 1                     | :  | ACCCGCGCCCCGCTCCCCCAGGACCCCTGCGGCCCGGACTGTGCGCCCCCGCGCCCGGCTCCCCCGGACTGTGCGCCCCCGGCTCCCCCGGACCCCTGCGGCTCCAACCTGTGCTCC | :  |                       | : 144 |
| 1-2-13-4  | 1                     | :  | .....G.....C.....                                                                                                     | :  |                       | : 144 |
| 1-2-14-4  | 1                     | :  | .....C.....                                                                                                           | :  |                       | : 144 |
| 1-8-3-4   | 1                     | :  | .....T.....                                                                                                           | :  |                       | : 144 |
| 1-2-5-4   | 1                     | :  | .....C.....G.....C.....                                                                                               | :  |                       | : 144 |
| 1-2-12-4  | 1                     | :  | .....G.....                                                                                                           | :  |                       | : 144 |
| 1-2-6-4   | 1                     | :  | .....G.....C.....C.....                                                                                               | :  |                       | : 144 |
| 1-26-3-4  | 1                     | :  | .....T.....                                                                                                           | :  |                       | : 144 |
| 1-17-3-4  | 1                     | :  | .....C...C..AC.....T..A.....                                                                                          | :  |                       | : 144 |
| 1-2-14-47 | 1                     | :  | .....C.....                                                                                                           | :  |                       | : 144 |
| 1-2-48-4  | 1                     | :  | .....G.....C.....                                                                                                     | :  |                       | : 144 |
| 1-46-13-4 | 1                     | :  | .....G.....G.....C.....                                                                                               | :  |                       | : 144 |
| 45-2-3-4  | 1                     | :  | .....C.....                                                                                                           | :  |                       | : 144 |
| 44-2-3-4  | 1                     | :  | .....T.....                                                                                                           | :  |                       | : 144 |

  

|           | 4 <sup>th</sup> motif | 192 |                                                 |       |
|-----------|-----------------------|-----|-------------------------------------------------|-------|
| 1-2-3-4   | 145                   | :   | CCCCGCGCCCCGCTCCCCCGGACCCCTGCGGCTCCAACCTGTGCTCC | : 192 |
| 1-2-13-4  | 145                   | :   | .....                                           | : 192 |
| 1-2-14-4  | 145                   | :   | .....                                           | : 192 |
| 1-8-3-4   | 145                   | :   | .....                                           | : 192 |
| 1-2-5-4   | 145                   | :   | .....                                           | : 192 |
| 1-2-12-4  | 145                   | :   | .....                                           | : 192 |
| 1-2-6-4   | 145                   | :   | .....                                           | : 192 |
| 1-26-3-4  | 145                   | :   | .....                                           | : 192 |
| 1-17-3-4  | 145                   | :   | .....                                           | : 192 |
| 1-2-14-47 | 145                   | :   | .....A.....                                     | : 192 |
| 1-2-48-4  | 145                   | :   | .....                                           | : 192 |
| 1-46-13-4 | 145                   | :   | .....                                           | : 192 |
| 45-2-3-4  | 145                   | :   | .....                                           | : 192 |
| 44-2-3-4  | 145                   | :   | .....                                           | : 192 |

## 7R haplotypes

|                | 1 <sup>st</sup> motif | 48 | 2 <sup>nd</sup> motif                                                                                                                     | 96 | 3 <sup>rd</sup> motif | 144 |
|----------------|-----------------------|----|-------------------------------------------------------------------------------------------------------------------------------------------|----|-----------------------|-----|
| 1-2-6-5-2-5-4  | 1                     | :  | ACCCGCGCCCCGCTCCCCAGGACCCCTGCGGCCCGGACTGTGCGCCCCCGCGCCCGGCTTCCCCGGGGTCCCTGCGGCCCGGACTGTGCGCCCCCGCGCCCGGCTCCCCCGGACCCCTGCGGCCCGGACTGTGCGCC | :  | 144                   | :   |
| 1-2-6-5-2-5-19 | 1                     | :  | .....                                                                                                                                     | :  | 144                   | :   |
| 1-8-25-5-2-5-4 | 1                     | :  | .....T.....                                                                                                                               | :  | 144                   | :   |
| 1-2-3-17-2-5-4 | 1                     | :  | .....A.....A.....T.....                                                                                                                   | :  | 144                   | :   |
| 1-2-6-1-2-3-4  | 1                     | :  | .....                                                                                                                                     | :  | 144                   | :   |
| 1-2-6-5-2-3-4  | 1                     | :  | .....                                                                                                                                     | :  | 144                   | :   |
| 1-2-5-5-2-5-4  | 1                     | :  | .....C.....A.....                                                                                                                         | :  | 144                   | :   |
| 1-2-6-5-37-5-4 | 1                     | :  | .....                                                                                                                                     | :  | 144                   | :   |
| 1-2-6-5-39-3-4 | 1                     | :  | .....                                                                                                                                     | :  | 144                   | :   |
| 40-2-6-5-2-5-4 | 1                     | :  | .....T.....                                                                                                                               | :  | 144                   | :   |
| 1-41-6-5-2-5-4 | 1                     | :  | .....T.....                                                                                                                               | :  | 144                   | :   |
| 1-2-42-5-2-5-4 | 1                     | :  | .....                                                                                                                                     | :  | 143                   | :   |
| 43-2-6-5-2-5-4 | 1                     | :  | .....                                                                                                                                     | :  | 143                   | :   |

  

|                | 4 <sup>th</sup> motif | 192 | 5 <sup>th</sup> motif                                                                                                                     | 240 | 6 <sup>th</sup> motif | 288 |
|----------------|-----------------------|-----|-------------------------------------------------------------------------------------------------------------------------------------------|-----|-----------------------|-----|
| 1-2-6-5-2-5-4  | 145                   | :   | CCCCGCGCCCGGCTCCCCAGGACCCCTGCGGCCCGGACTGTGCGCCCCCGCGCCCGGCTTCCCCGGGGTCCCTGCGGCCCGGACTGTGCGCCCCCGCGCCCGGCTCCCCAGGACCCCTGCGGCCCGGACTGTGCGCC | :   | 288                   | :   |
| 1-2-6-5-2-5-19 | 145                   | :   | .....                                                                                                                                     | :   | 288                   | :   |
| 1-8-25-5-2-5-4 | 145                   | :   | .....                                                                                                                                     | :   | 288                   | :   |
| 1-2-3-17-2-5-4 | 145                   | :   | .....C.....T..A.....                                                                                                                      | :   | 288                   | :   |
| 1-2-6-1-2-3-4  | 145                   | :   | A.....C.....                                                                                                                              | :   | 288                   | :   |
| 1-2-6-5-2-3-4  | 145                   | :   | .....G.....A.....T.....                                                                                                                   | :   | 288                   | :   |
| 1-2-5-5-2-5-4  | 145                   | :   | .....G.....A.....                                                                                                                         | :   | 288                   | :   |
| 1-2-6-5-37-5-4 | 145                   | :   | .....CG.....                                                                                                                              | :   | 288                   | :   |
| 1-2-6-5-39-3-4 | 145                   | :   | .....G.....G.....A.....T.....                                                                                                             | :   | 288                   | :   |
| 40-2-6-5-2-5-4 | 145                   | :   | .....                                                                                                                                     | :   | 288                   | :   |
| 1-41-6-5-2-5-4 | 145                   | :   | .....                                                                                                                                     | :   | 288                   | :   |
| 1-2-42-5-2-5-4 | 144                   | :   | .....                                                                                                                                     | :   | 287                   | :   |
| 43-2-6-5-2-5-4 | 144                   | :   | .....                                                                                                                                     | :   | 287                   | :   |

  

|                | 7 <sup>th</sup> motif | 336 |
|----------------|-----------------------|-----|
| 1-2-6-5-2-5-4  | 289                   | :   |
| 1-2-6-5-2-5-19 | 289                   | :   |
| 1-8-25-5-2-5-4 | 289                   | :   |
| 1-2-3-17-2-5-4 | 289                   | :   |
| 1-2-6-1-2-3-4  | 289                   | :   |
| 1-2-6-5-2-3-4  | 289                   | :   |
| 1-2-5-5-2-5-4  | 289                   | :   |
| 1-2-6-5-37-5-4 | 289                   | :   |
| 1-2-6-5-39-3-4 | 289                   | :   |
| 40-2-6-5-2-5-4 | 289                   | :   |
| 1-41-6-5-2-5-4 | 289                   | :   |
| 1-2-42-5-2-5-4 | 288                   | :   |
| 43-2-6-5-2-5-4 | 288                   | :   |
