# Supplementary material for: DRD4 Rare Variants in Attention-Deficit/Hyperactivity Disorder (ADHD): Further Evidence from a Birth Cohort Study
Source: PubMed Central journal article supplement (PMC3877354; doi:10.1371/journal.pone.0085164), 2013-12-31

## Study Flow Chart

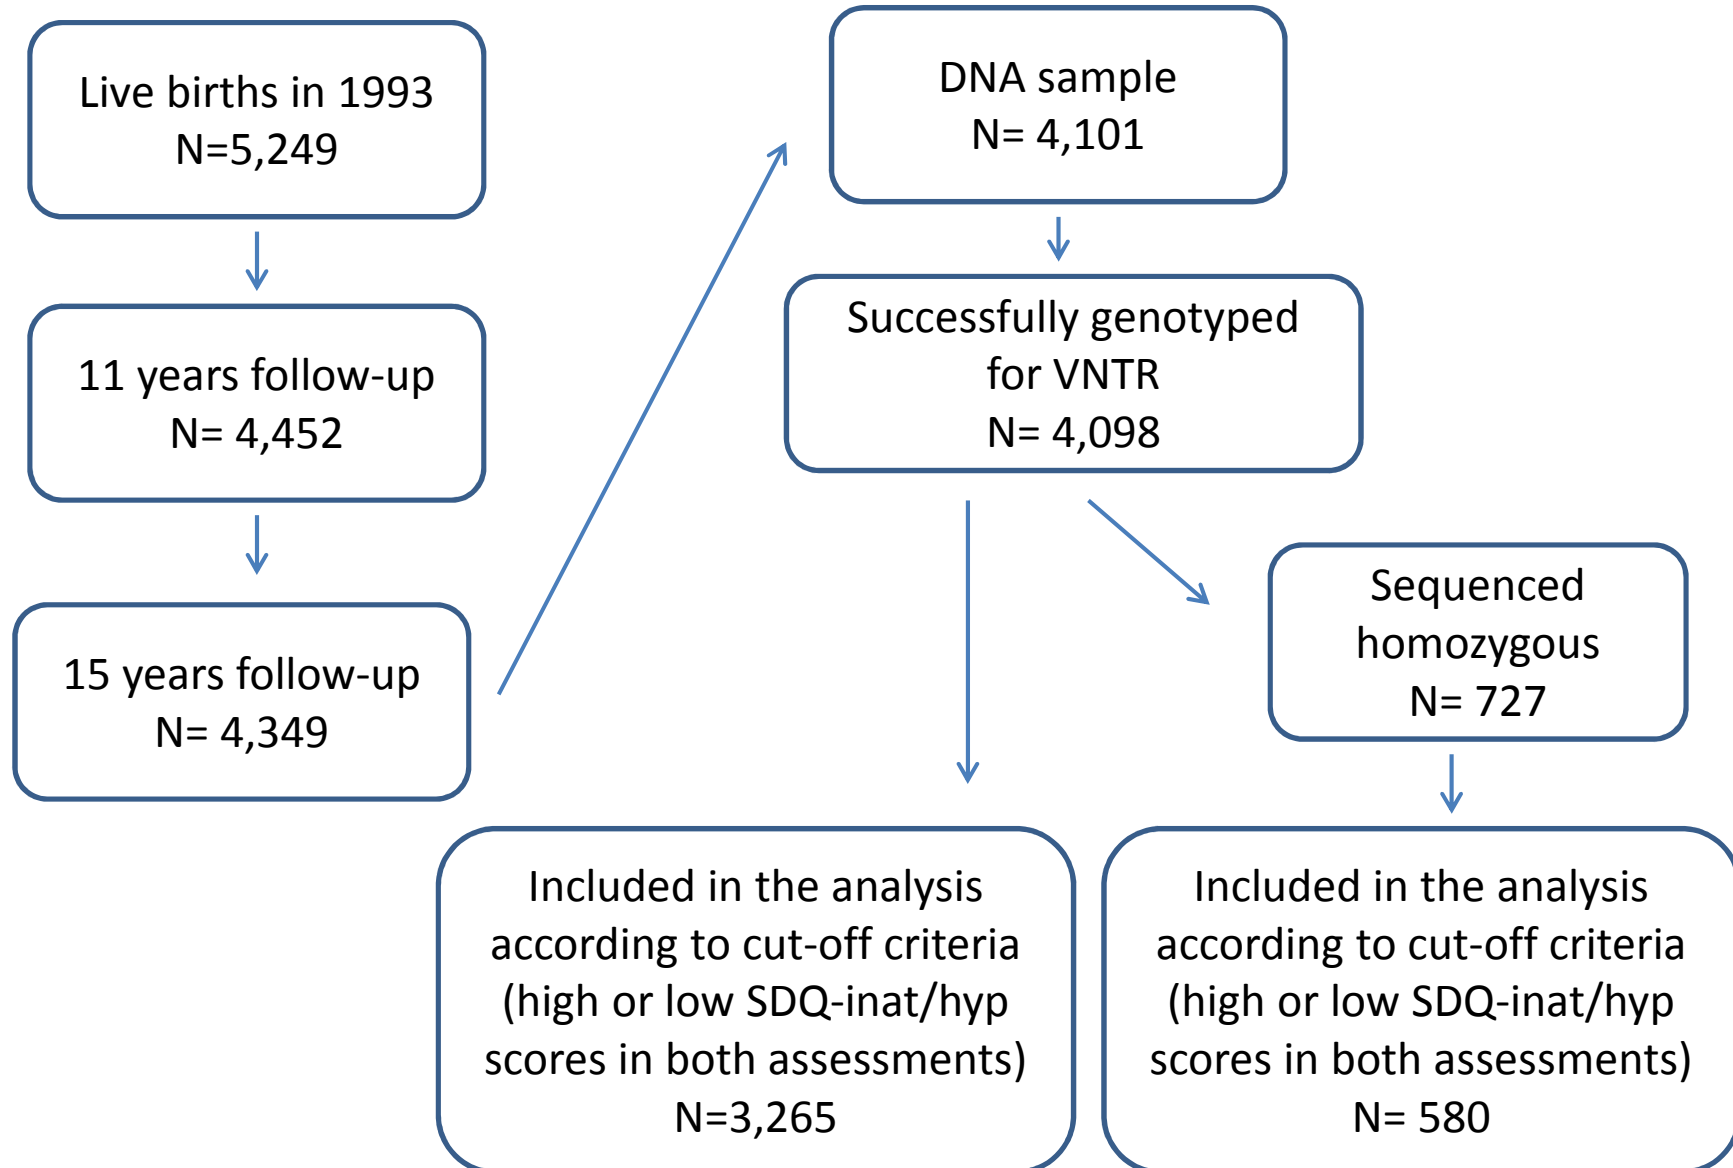

Supplement: pone.0085164.s003.pdf [file pone.0085164.s003.pdf]
